# Supplementary material for: A novel evaluation approach for functional impairment in subacromial impingement syndrome: focus on Temporal Summation of Activity-related Pain (TSAP)
Source: PeerJ journal article supplement (doi:10.7717/peerj.19638), 2025-07-03
Supplement: raw_data.xlsx [file raw_data.xlsx]

## Sheet: raw data
age	sex (female: 0, male:1)	height	weight	duration of pain (m)	diagnoses	Pain VAS during daily activities	SMP	TSAP_score	TSP_Del	TSP_Del_c	ROM	Muscle strength of shoulder abduction	CSI9	DASH
70	0	1.565	54	11	RCT	42	49	5	24	29	170	49	18	20.4545
51	1	1.82	79	120	Others	30	15	18	0	32	180	27	9	4.54545
55	0	1.53	70	6	AC	29	24	4	0	0	170	24	15	15.9091
53	0	1.54	68	6	AC	24	45	6	0	0	90	12	14	27.2727
55	0	1.67	70	4	RCT	22	14	0	-12	-3	100	15	16	38.6364
59	0	1.55	40	5	AC	60	66	47	60	50	180	24	18	77.2727
52	1	1.7	61	6	RCT	100	20	5	23	10	130	158.8	6	56.25
66	0	1.49	47.5	9	RCT	100	51	24	90	81	100	114.7	21	52.0833
77	0	1.43	57	6	RCT	65	12	48	95	20	95	16	24	64.5833
71	1	1.63	67	60	CTA	72	12	7	22	25	90	20.9	8	20.8333
52	1	1.73	83.3	12	RCT	56	10	5	4	7	130	36.5	16	39.5833
64	1	1.67	56.7	12	RCT	50	21	42	19	10	140	45.4	18	37.5
75	1	1.65	54.5	29	RCT	50	12	8	25	19	120	56.05	12	33.3333
76	1	1.65	62.9	48	RCT	60	12	58	60	60	90	101	14	43.75
76	0	1.42	47	12	RCT	75	30	48	50	45	95	48	24	38.6364
79	0	1.46	50.8	6	RCT	32	10	21	62	58	160	41.2	26	27.0833
59	1	1.64	69.5	6	RCT	100	34	7	4	3	150	20.9	21	25
60	0	1.43	47.5	3	RCT	76	40	39	28	27	95	18	8	56.25
80	1	1.68	64	10	CTA	60	20	10	39	21	100	28	9	14.5833
80	0	1.51	55.7	12	CTA	46	20	45	1	2	110	26.5	9	33.3333
65	1	1.62	77	3	RCT	80	10	60	54	56	170	77.9	6	31.25
75	1	1.59	61.2	6	CTA	65	15	4	0	5	100	35	15	14.5833
65	1	1.71	64.9	5	RCT	79	60	5	1	2	100	10	16	27.0833
51	1	1.65	69	19	RCT	5	5	5	2	0	150	118	9	0
72	1	1.69	72	4	RCT	75	30	10	10	15	90	17.3	7	18.75
48	1	1.8	82	12	RCT	57	5	10	4	4	100	114	2	2.08333
72	1	1.668	62.5	6	RCT	58	5	5	6	5	160	29.5	16	16.6667
71	0	1.56	56	3	RCT	45	15	10	12	11	95	32	13	31.25
73	0	1.525	60	72	RCT	65	21	44	37	34	110	27	20	58.3333
79	0	1.47	46	24	OA	55	10	34	55	6	150	46	3	8.33333
